# Supplementary material for: Aptasensor based on entropy-driven catalytic amplification system for the sensitive detection of acetamiprid in Chinese herbal medicine
Source: Royal Society of Chemistry journal article supplement (doi:10.1039/d4ay01655f), 2024-11-15
Supplement: d4ay01655f2.pdf [file d4ay01655f2.pdf]

## **Supplementary Material**

### **Aptasensor based on entropy-driven catalytic amplification system for sensitive detection of acetamiprid in Chinese herbal medicine**

Na Qin<sup>1</sup>, Sunlei Yang<sup>1</sup>, Rui Li<sup>1</sup>, Hongyun Zhan<sup>1</sup>, Lijuan Wang<sup>1</sup>, Fengyun  
Li<sup>2\*</sup>, Jingbo Liu<sup>1\*</sup>

#### **Table of Contents**

|                                                     |             |
|-----------------------------------------------------|-------------|
| <b>Instrumentation.....</b>                         | <b>P. 2</b> |
| <b>Optimization of experimental conditions.....</b> | <b>P. 2</b> |
| <b>Fig. S1.....</b>                                 | <b>P. 2</b> |

## 2.2 Instrumentation

Fluorescence spectra and UV-absorption spectra were recorded on a fluorescence spectrophotometer (F-4700, Hitachi High-Technologies Corporation) and UV-Vis spectrophotometer (U-3900, Hitachi High-Technologies Corporation), respectively. Gel electropherograms were obtained by a gel imager (Gel DocTM XR<sup>+</sup>, BIO-RAD Technologies, USA).

## 2.4 Optimization of experimental conditions

The aptamer-cDNA base sequences were first screened by modifying the BHQ1 quenching motif at the aptamer-3' end and the FAM fluorescent motif at the cDNA-5' end. The number of candidate DNA bases [1-4] were 20 and 49 lengths, respectively. 1  $\mu$ M aptamer, 1  $\mu$ M cDNA and 10 mM Mg(AC)<sub>2</sub> were added in 1X TAE buffer. methanol was used as a control instead of acetamiprid to detect the change in the fluorescence value of the solution. After that, the incubation method was optimized by adjusting the order of adding the targets, which were aptamer, cDNA and target at the same time; aptamer and cDNA were added first, then target, and aptamer was mixed and incubated with acetamiprid, then cDNA was added. all the above incubation methods were performed at 25°C, and the aptamer was reacted with aminopyrimidine for 2h, and the cDNA was reacted for 4h. Finally, the TAE buffer and PBS phosphate solution as a buffer screen.

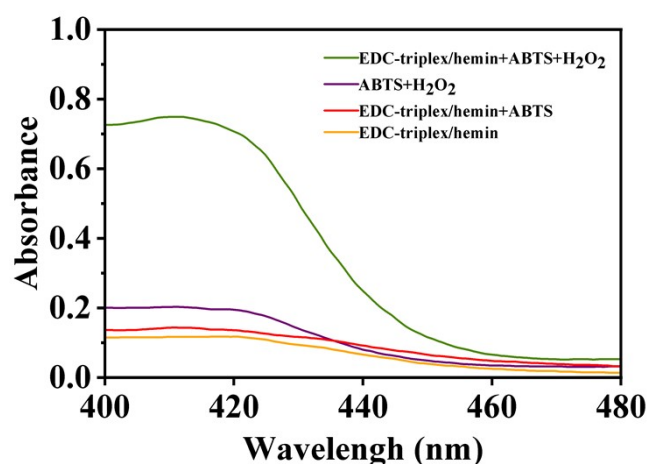

**Fig. S1** Verifying the catalytic activity of G-quadruplex/hemin for hydrogen peroxide

## References

- [1] Yan J, Chen L, Teng M, Hao M, Feng B, Yang F, Shen H, Yu S, Wang L. Dual Recognition

Strategy for the Rapid and Precise Detection of *Bacillus cereus* Using Post-Modified nano-MOF and Aptamer. *Sens. Actuators B Chem.* (2023) 386, 133745. DOI:10.1016/J.SNB.2023.133745.

- [2] Lu X, and Fan Z. RecJf exonuclease-assisted fluorescent self-assembly aptasensor for supersensitive detection of pesticides in food. *Journal of Luminescence*, (2020) 226, p.117469. DOI: [org/10.1016/j.jlumin.2020.117469](https://doi.org/10.1016/j.jlumin.2020.117469)
- [3] Bahreyni A, Yazdian-Robati R, Ramezani M, Abnou, K, and Taghdisi S M. Fluorometric aptasensing of the neonicotinoid insecticide acetamiprid by using multiple complementary strands and gold nanoparticles. *Microchimica Acta*, (2018) 185, 1-7. DOI: [org/10.1007/s00604-018-2805-7](https://doi.org/10.1007/s00604-018-2805-7).
- [4] Abnous K, Danesh N M, Ramezani M, Alibolandi M, Lavaee P, and Taghdisi S M. Aptamer based fluorometric acetamiprid assay using three kinds of nanoparticles for powerful signal amplification. *Microchimica Acta*, (2017) 184, 81-90. DOI: [10.1007/s00604-016-1992-3](https://doi.org/10.1007/s00604-016-1992-3)
